# Supplementary material for: Nuclear Receptor-Mediated Alleviation of Alcoholic Fatty Liver by Polyphenols Contained in Alcoholic Beverages
Source: PubMed Central journal article supplement (PMC3911942; doi:10.1371/journal.pone.0087142), 2014-02-03

A

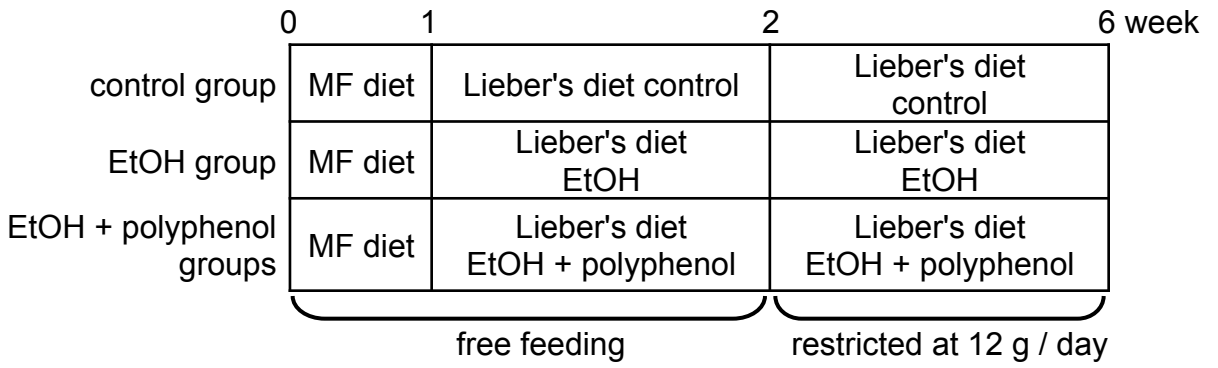

B

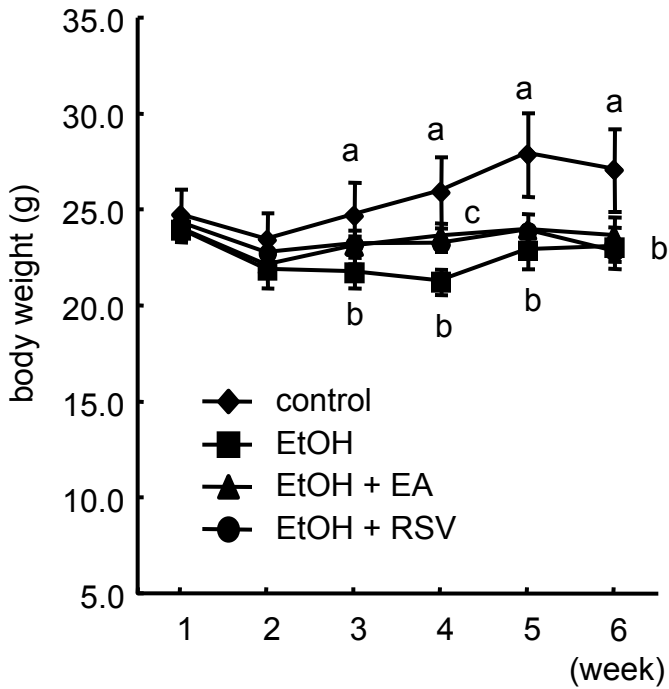

C

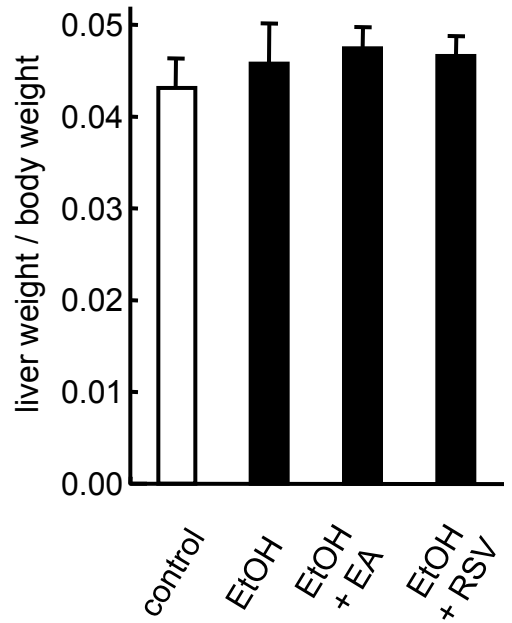

Supplement: pone.0087142.s001.pdf [file pone.0087142.s001.pdf]
