# Supplementary material for: Nuclear Receptor-Mediated Alleviation of Alcoholic Fatty Liver by Polyphenols Contained in Alcoholic Beverages
Source: PubMed Central journal article supplement (PMC3911942; doi:10.1371/journal.pone.0087142), 2014-02-03
Supplement: pone.0087142.s003.pdf [file pone.0087142.s003.pdf]

Table S1. Formula of each diet (g)

|                                                  | control | EtOH   | EtOH<br>+<br>polyphenol |
|--------------------------------------------------|---------|--------|-------------------------|
| casein sodium salt                               | 41.4    | 41.4   | 41.4                    |
| l - cystine                                      | 0.5     | 0.5    | 0.5                     |
| dl - methionine                                  | 0.3     | 0.3    | 0.3                     |
| corn oil                                         | 8.5     | 8.5    | 8.5                     |
| olive oil                                        | 28.4    | 28.4   | 28.4                    |
| safflower oil                                    | 2.7     | 2.7    | 2.7                     |
| vitamin mix                                      | 2.5     | 2.5    | 2.5                     |
| mineral mix                                      | 8.75    | 8.75   | 8.75                    |
| mixture of equal parts of<br>maltose and dextrin | 115.2   | 25.6   | 25.6                    |
| cellulose                                        | 10.0    | 10.0   | 10.0                    |
| choline bitartrate                               | 0.53    | 0.53   | 0.53                    |
| xanthane gum                                     | 3.0     | 3.0    | 3.0                     |
| total                                            | 221.78  | 182.18 | 182.18                  |
| ethanol                                          | 0 mL    | 50 mL  | 50 mL                   |
| water                                            | 1000 mL | 950 mL | 950 mL                  |
| ellagic acid or<br>resveratrol                   | 0       | 0      | 73 mg                   |
