# Supplementary material for: Nuclear Receptor-Mediated Alleviation of Alcoholic Fatty Liver by Polyphenols Contained in Alcoholic Beverages
Source: PubMed Central journal article supplement (PMC3911942; doi:10.1371/journal.pone.0087142), 2014-02-03
Supplement: pone.0087142.s004.pdf [file pone.0087142.s004.pdf]

Table S2. Analyses of serum markers

|                                        | genotype | control            | EtOH               | EtOH + EA          | EtOH + RSV         |
|----------------------------------------|----------|--------------------|--------------------|--------------------|--------------------|
| total cholesterol (mg/dL)              | WT       | 174±10.0           | 187±11.2           | 191±15.3           | 193±10.1           |
|                                        | CAR KO   | 150±27.0           | 194±11.0           | 196±17.5           | 182±24.2           |
| triacylglycerol (mg/dL)                | WT       | 91.8±14.1 <b>a</b> | 60.5±9.88 <b>b</b> | 54.8±9.50 <b>b</b> | 42.5±11.8 <b>b</b> |
|                                        | CAR KO   | 37.3±8.08          | 52.7±23.9          | 57.3±4.73          | 41.7±13.2          |
| non-esterified free fatty acid (μEq/L) | WT       | 2100±832           | 1360±374           | 1330±215           | 1270±126           |
|                                        | CAR KO   | 1530±356           | 1390±207           | 1530±359           | 1160±163           |
| total bilirubin (mg/dL)                | WT       | 0.0925±0.0150      | 0.157±0.0768       | 0.0875±0.0299      | 0.107±0.0189       |
|                                        | CAR KO   | 0.130±0.0300       | 0.206±0.0642       | 0.143±0.00577      | 0.170±0.0436       |
| glucose (mg/dL)                        | WT       | 144±32.9           | 128±32.0           | 154±43.5           | 139±20.1           |
|                                        | CAR KO   | 107±55.5           | 61.7±26.4          | 118±25.1           | 102±55.2           |
| total ketone bod (μmol/L)              | WT       | 433±166            | 913.±281           | 1030±384           | 1050±370           |
|                                        | CAR KO   | 520±68.8           | 1430±711           | 1410±322           | 1430±877           |
| HDL-cholesterol (mg/dL)                | WT       | 102±2.06 <b>a</b>  | 117±11.4 <b>ab</b> | 126±7.66 <b>b</b>  | 118±5.74 <b>b</b>  |
|                                        | CAR KO   | 88.3±12.5          | 117±18.9           | 116±11.2           | 101±7.00           |
| LDL-cholesterol (mg/dL)                | WT       | 8.50±1.91          | 8.00±1.63          | 7.75±2.87          | 7.50±0.58          |
|                                        | CAR KO   | 10.0±2.00          | 7.67±1.53          | 9.67±2.00          | 12.3±4.51          |

a and b: Tukey's multiple comparison between control, EtOH, EtOH + EA and EtOH + RSV groups each of which contains 4 (WT) or 3 (CAR KO) mice
