# Supplementary material for: Nuclear Receptor-Mediated Alleviation of Alcoholic Fatty Liver by Polyphenols Contained in Alcoholic Beverages
Source: PubMed Central journal article supplement (PMC3911942; doi:10.1371/journal.pone.0087142), 2014-02-03
Supplement: pone.0087142.s005.pdf [file pone.0087142.s005.pdf]

Table S3. The list of 52 genes assigned to the GO-terms for 323 probe set

| Gene name                                                                                                 | Gene symbol    | probe ID                                                 | Mapped panel in Fig.3 | Reported to be regulated by CAR | Similarity regulated in CAR KO mice |
|-----------------------------------------------------------------------------------------------------------|----------------|----------------------------------------------------------|-----------------------|---------------------------------|-------------------------------------|
| <b>GO:0006986~response to unfolded protein</b>                                                            |                |                                                          |                       |                                 |                                     |
| DnaJ (Hsp40) homolog, subfamily C, member 3                                                               | Dnajc3         | 1419162_S_AT<br>1433887_AT<br>1419163_S_AT<br>1449372_AT |                       |                                 |                                     |
| UBX domain protein 4                                                                                      | Ubxn4          | 1426486_AT<br>1426485_AT                                 |                       |                                 |                                     |
| mesencephalic astrocyte-derived neurotrophic factor                                                       | Manf           | 1428112_AT                                               |                       |                                 |                                     |
| predicted gene 5511; heat shock protein 90, alpha (cytosolic), class A member 1                           | Hsp90a a1      | 1426645_AT<br>1437497_A_AT<br>1438902_A_AT               |                       |                                 |                                     |
| stress-associated endoplasmic reticulum protein 1                                                         | Serp1*         | 1415827_A_AT                                             |                       |                                 |                                     |
| synovial apoptosis inhibitor 1, synoviolin                                                                | Syvn1          | 1443609_S_AT<br>1428070_AT                               |                       |                                 |                                     |
| <b>GO:0043161~proteasomal ubiquitin-dependent protein catabolic process</b>                               |                |                                                          |                       |                                 |                                     |
| STIP1 homology and U-Box containing protein 1                                                             | Stub1*         | 1416580_A_AT                                             |                       |                                 |                                     |
| predicted gene 3375; proteasome (prosome, macropain) subunit, beta type 5                                 | Psmb5          | 1415676_A_AT                                             |                       |                                 |                                     |
| protease (prosome, macropain) 26S subunit, ATPase 5                                                       | Psmc5*         | 1415740_AT                                               |                       |                                 |                                     |
| protein phosphatase 2, regulatory subunit B (B56), gamma isoform                                          | Ppp2r5 c       | 1425542_A_AT                                             |                       |                                 |                                     |
| <b>GO:0031016~pancreas development</b>                                                                    |                |                                                          |                       |                                 |                                     |
| X-box binding protein 1                                                                                   | Xbp1           | 1420011_S_AT<br>1420886_A_AT<br>1437223_S_AT             |                       |                                 |                                     |
| immunoglobulin-like domain containing receptor 2                                                          | Ildr2          | 1436221_AT<br>1436293_X_AT                               |                       |                                 |                                     |
| one cut domain, family member 1                                                                           | Onecut 1*      | 1450252_AT                                               | A                     |                                 |                                     |
| one cut domain, family member 2                                                                           | Onecut 2*      | 1460044_AT                                               |                       |                                 |                                     |
| <b>GO:0051246~regulation of protein metabolic process</b>                                                 |                |                                                          |                       |                                 |                                     |
| Jun oncogene                                                                                              | Jun*           | 1448694_AT<br>1417409_AT                                 |                       |                                 |                                     |
| STIP1 homology and U-Box containing protein 1                                                             | Stub1*         | 1416580_A_AT                                             |                       |                                 |                                     |
| aryl hydrocarbon receptor nuclear translocator-like                                                       | Arntl (Bmal1)* | 1425099_A_AT                                             | H                     |                                 |                                     |
| cell division cycle 34 homolog (S. cerevisiae); similar to Cell division cycle 34 homolog (S. cerevisiae) | Cdc34          | 1434879_AT                                               |                       |                                 |                                     |
| cystathionine beta-synthase                                                                               | Cbs            | 1425623_A_AT<br>1423844_S_AT                             | I                     |                                 |                                     |

|                                                                         |           |                                              |   |  |   |   |
|-------------------------------------------------------------------------|-----------|----------------------------------------------|---|--|---|---|
| cytoplasmic polyadenylation element binding protein 2                   | Cpeb2     | 1443017_AT<br>1458518_AT<br>1434272_AT       |   |  |   | + |
| imprinted and ancient                                                   | Impact *  | 1415911_AT                                   |   |  |   |   |
| signal recognition particle 9                                           | Srp9*     | 1417530_A_AT                                 |   |  |   |   |
| stress-associated endoplasmic reticulum protein 1                       | Serp1*    | 1415827_A_AT                                 |   |  |   |   |
| suppressor of cytokine signaling 3                                      | Socs3     | 1456212_X_AT<br>1455899_X_AT                 |   |  |   |   |
| ubiquitin-conjugating enzyme E2A, RAD6 homolog (S. cerevisiae)          | Ube2a     | 1448772_AT                                   |   |  |   |   |
| zinc finger protein 36, C3H type-like 1                                 | Zfp3611   | 1422528_A_AT                                 |   |  |   |   |
| <b>GO:0051085~chaperone mediated protein folding requiring cofactor</b> |           |                                              |   |  |   |   |
| DnaJ (Hsp40) homolog, subfamily B, member 1                             | Dnajb1    | 1416756_AT                                   |   |  |   |   |
| heat shock 105kDa/110kDa protein 1                                      | Hsph1     | 1423566_A_AT<br>1425993_A_AT                 |   |  |   |   |
| similar to heat shock protein 8; heat shock protein 8                   | Hspa8     | 1420622_A_AT<br>1420623_X_AT<br>1455789_X_AT |   |  |   |   |
| <b>GO:0006006~glucose metabolic process</b>                             |           |                                              |   |  |   |   |
| glucokinase                                                             | Gck *     | 1419146_A_AT<br>1425303_AT                   | A |  |   |   |
| myelocytomatosis oncogene                                               | Myc *     | 1424942_A_AT                                 |   |  |   |   |
| one cut domain, family member 1                                         | Onecut 1* | 1450252_AT                                   | A |  |   |   |
| phosphogluconate dehydrogenase                                          | Pgd *     | 1437380_X_AT<br>1436771_X_AT<br>1438627_X_AT | A |  | + |   |
| protein phosphatase 1, regulatory (inhibitor) subunit 3B                | Ppp1r3 b  | 1436590_AT                                   | A |  | + |   |
| pyruvate dehydrogenase kinase, isoenzyme 4                              | Pdk4      | 1417273_AT                                   | A |  |   |   |
| stress-associated endoplasmic reticulum protein 1                       | Serp1*    | 1415827_A_AT                                 |   |  |   |   |
| <b>GO:0043603~cellular amide metabolic process</b>                      |           |                                              |   |  |   |   |
| argininosuccinate synthetase 1                                          | Ass1      | 1459937_AT                                   |   |  |   |   |
| glucokinase                                                             | Gck *     | 1419146_A_AT<br>1425303_AT                   | A |  |   |   |
| kynureninase (L-kynurenine hydrolase)                                   | Kynu      | 1430570_AT                                   | F |  |   |   |
| phosphogluconate dehydrogenase                                          | Pgd *     | 1436771_X_AT<br>1437380_X_AT<br>1438627_X_AT | A |  | + |   |
| <b>GO:0031324~negative regulation of cellular metabolic process</b>     |           |                                              |   |  |   |   |
| Jun oncogene                                                            | Jun *     | 1448694_AT<br>1417409_AT                     |   |  |   |   |
| Kruppel-like factor 11                                                  | Klf11     | 1437241_AT                                   |   |  |   |   |
| forkhead box P1                                                         | Foxp1     | 1455242_AT<br>1421141_A_AT                   |   |  |   |   |
| glucokinase                                                             | Gck *     | 1419146_A_AT<br>1425303_AT                   | A |  |   |   |
| imprinted and ancient                                                   | Impact *  | 1415911_AT                                   |   |  |   |   |
| inhibitor of DNA binding 2                                              | Id2       | 1422537_A_AT                                 |   |  |   |   |
| insulin induced gene 2                                                  | Insig2    | 1417981_AT                                   | B |  | + |   |

|                                                                                                                                                                          |                |                                                                        |   |  |   |
|--------------------------------------------------------------------------------------------------------------------------------------------------------------------------|----------------|------------------------------------------------------------------------|---|--|---|
|                                                                                                                                                                          |                | 1417980_A_AT                                                           |   |  |   |
| interferon regulatory factor 2 binding protein 2                                                                                                                         | Irf2bp2        | 1433633_AT<br>1433634_AT<br>1433632_AT                                 |   |  | + |
| myelocytomatosis oncogene                                                                                                                                                | Myc *          | 1424942_A_AT                                                           |   |  |   |
| nuclear receptor interacting protein 1                                                                                                                                   | Nrip1          | 1434384_AT                                                             |   |  |   |
| protease (prosome, macropain) 26S subunit, ATPase 5                                                                                                                      | Psmc5*         | 1415740_AT                                                             |   |  |   |
| signal recognition particle 9                                                                                                                                            | Srp9*          | 1417530_A_AT                                                           |   |  |   |
| similar to cytoplasmic dynein light chain 1; predicted gene 11582; dynein light chain LC8-type 1; predicted gene 6788                                                    | Dynll1         | 1417339_A_AT                                                           |   |  |   |
| transducin-like enhancer of split 4, homolog of Drosophila E(spl)                                                                                                        | Tle4           | 1450853_AT                                                             |   |  |   |
| zinc finger and BTB domain containing 16                                                                                                                                 | Zbtb16         | 1442025_A_AT<br>1427638_AT<br>1419874_X_AT<br>1442026_AT<br>1439163_AT |   |  | + |
| <b>GO:0006886~intracellular protein transport</b>                                                                                                                        |                |                                                                        |   |  |   |
| RAB1, member RAS oncogene family                                                                                                                                         | Rab1           | 1416082_AT                                                             |   |  |   |
| Sec24 related gene family, member D (S. cerevisiae)                                                                                                                      | Sec24d         | 1426972_AT                                                             |   |  |   |
| Sec61 alpha 1 subunit (S. cerevisiae)                                                                                                                                    | Sec61a1        | 1416190_A_AT<br>1416189_A_AT<br>1448242_AT<br>1434986_A_AT             |   |  |   |
| aryl hydrocarbon receptor nuclear translocator-like                                                                                                                      | Arntl (Bmal1)* | 1425099_A_AT                                                           | H |  |   |
| coatamer protein complex, subunit gamma                                                                                                                                  | Copg           | 1416017_AT<br>1415670_AT                                               |   |  |   |
| histocompatibility 47                                                                                                                                                    | H47            | 1448704_S_AT<br>1435735_X_AT<br>1452095_A_AT                           |   |  |   |
| predicted gene, EG546165; predicted gene 2423; hypothetical protein LOC674211; tyrosine 3-monooxygenase/tryptophan 5-monooxygenase activation protein, theta polypeptide | Ywhaq          | 1432842_S_AT                                                           |   |  |   |
| signal recognition particle 9                                                                                                                                            | Srp9*          | 1417530_A_AT                                                           |   |  |   |
| transmembrane emp24-like trafficking protein 10 (yeast); predicted gene 4024                                                                                             | Tmed10         | 1424707_AT                                                             |   |  |   |
| tyrosine 3-monooxygenase/tryptophan 5-monooxygenase activation protein, beta polypeptide                                                                                 | Ywhab          | 1436783_X_AT                                                           |   |  |   |
| <b>GO:0030512~negative regulation of transforming growth factor beta receptor signaling pathway</b>                                                                      |                |                                                                        |   |  |   |
| heat shock protein 5                                                                                                                                                     | Hspa5          | 1447824_X_AT<br>1416064_A_AT                                           |   |  |   |

|                                 |           |              |   |  |  |
|---------------------------------|-----------|--------------|---|--|--|
|                                 |           | 1427464_S_AT |   |  |  |
| one cut domain, family member 1 | Onecut 1* | 1450252_AT   | A |  |  |
| one cut domain, family member 2 | Onecut 2* | 1460044_AT   |   |  |  |

\* : Genes appearing more than two times in the functional groupings.
