# Supplementary material for: Nuclear Receptor-Mediated Alleviation of Alcoholic Fatty Liver by Polyphenols Contained in Alcoholic Beverages
Source: PubMed Central journal article supplement (PMC3911942; doi:10.1371/journal.pone.0087142), 2014-02-03
Supplement: pone.0087142.s006.pdf [file pone.0087142.s006.pdf]

Table S4. The list of 41 genes assigned to the GO-terms for 287 probe set

| Gene name                                                                             | Gene symbol                         | probe ID                   | Mapped panel in Fig.3 | Reported to be regulated by CAR | Similary regulated in CAR KO mice |
|---------------------------------------------------------------------------------------|-------------------------------------|----------------------------|-----------------------|---------------------------------|-----------------------------------|
| <b>GO:0055114~oxidation reduction</b>                                                 |                                     |                            |                       |                                 |                                   |
| 2-4-dienoyl-Coenzyme A reductase 2, peroxisomal                                       | Decr2                               | 1423495_AT                 |                       |                                 |                                   |
| WW domain-containing oxidoreductase                                                   | Wwox                                | 1446412_AT<br>1431960_AT   |                       |                                 |                                   |
| butyrobetaine (gamma), 2-oxoglutarate dioxygenase 1 (gamma-butyrobetaine hydroxylase) | Bbox1                               | 1459030_AT                 |                       |                                 |                                   |
| cDNA sequence BC089597                                                                | BC089597<br>(retinol dehydrogenase) | 1451681_AT                 |                       |                                 | +                                 |
| cytochrome P450, family 2, subfamily d, polypeptide 9                                 | Cyp2d9                              | 1419349_A_AT               |                       |                                 | +                                 |
| cytochrome P450, family 7, subfamily a, polypeptide 1                                 | Cyp7a1*                             | 1422100_AT<br>1438743_AT   | B                     | +                               | +                                 |
| cytochrome P450, family 7, subfamily b, polypeptide 1                                 | Cyp7b1*                             | 1421074_AT<br>1421075_S_AT | B                     | +                               |                                   |
| dihydrofolate reductase                                                               | Dhfr                                | 1419172_AT                 | G                     |                                 |                                   |
| fatty acid desaturase 2                                                               | Fads2*                              | 1419031_AT<br>1443838_X_AT | E                     |                                 |                                   |
| fatty acid synthase                                                                   | Fasn *                              | 1423828_AT                 | D                     | +                               |                                   |
| gulonolactone (L-) oxidase                                                            | Gulo                                | 1451297_AT                 |                       |                                 |                                   |
| hydroxy-delta-5-steroid dehydrogenase, 3 beta- and steroid delta-isomerase 5          | Hsd3b5*                             | 1420531_AT                 | B                     |                                 |                                   |
| retinol dehydrogenase 11                                                              | Rdh11                               | 1449209_A_AT               |                       |                                 |                                   |
| retinol dehydrogenase 14 (all-trans and 9-cis)                                        | Rdh14                               | 1417438_AT                 |                       |                                 |                                   |
| short chain dehydrogenase/reductase family 42E, member 1                              | Sdr42e1*                            | 1427082_AT                 |                       |                                 |                                   |
| squalene epoxidase                                                                    | Sqle                                | 1415993_AT                 | B                     | +                               |                                   |
| sterol-C4-methyl oxidase-like                                                         | Sc4mol *                            | 1423078_A_AT               | B                     | +                               |                                   |
| transmembrane 7 superfamily member 2                                                  | Tm7sf2 *                            | 1460684_AT                 | B                     |                                 |                                   |
| <b>GO:0006694~steroid biosynthetic process</b>                                        |                                     |                            |                       |                                 |                                   |
| alpha-methylacyl-CoA racemase                                                         | Amacr                               | 1417208_AT                 | C                     |                                 |                                   |
| cytochrome P450, family 7, subfamily b, polypeptide 1                                 | Cyp7b1*                             | 1421074_AT<br>1421075_S_AT | B                     |                                 |                                   |
| hydroxy-delta-5-steroid dehydrogenase, 3 beta- and steroid delta-isomerase 5          | Hsd3b5*                             | 1420531_AT                 | B                     |                                 |                                   |
| short chain                                                                           | Sdr42e1*                            | 1427082_AT                 |                       |                                 |                                   |

|                                                                                           |                 |                                        |   |   |   |
|-------------------------------------------------------------------------------------------|-----------------|----------------------------------------|---|---|---|
| dehydrogenase/reductase family 42E, member 1                                              |                 |                                        |   |   |   |
| similar to Hmgcs1 protein;<br>3-hydroxy-3-methylglutaryl-Coenzyme A synthase 1            | Hmgcs1*         | 1433445_X_AT<br>1433443_A_AT           | B | + |   |
| sterol-C4-methyl oxidase-like                                                             | Sc4mol *        | 1423078_A_AT                           | B | + |   |
| transmembrane 7 superfamily member 2                                                      | Tm7sf2*         | 1460684_AT                             | B |   |   |
| <b>GO:0008203~cholesterol metabolic process</b>                                           |                 |                                        |   |   |   |
| cytochrome P450, family 7, subfamily a, polypeptide 1                                     | Cyp7a1*         | 1438743_AT<br>1422100_AT               | B | + | + |
| cytochrome P450, family 7, subfamily b, polypeptide 1                                     | Cyp7b1*         | 1421074_AT<br>1421075_S_AT             | B | + |   |
| serum amyloid A 1                                                                         | Saa1            | 1450788_AT<br>1419075_S_AT             |   | + | + |
| similar to Hmgcs1 protein;<br>3-hydroxy-3-methylglutaryl-Coenzyme A synthase 1            | Hmgcs1*         | 1433443_A_AT<br>1433445_X_AT           | B | + |   |
| transmembrane 7 superfamily member 2                                                      | Tm7sf2 *        | 1460684_AT                             | B |   |   |
| <b>GO:0006633~fatty acid biosynthetic process</b>                                         |                 |                                        |   |   |   |
| fatty acid desaturase 2                                                                   | Fads2*          | 1419031_AT<br>1443838_X_AT             | E |   |   |
| fatty acid synthase                                                                       | Fasn *          | 1423828_AT                             | D | + |   |
| predicted gene 11295; ELOVL family member 6, elongation of long chain fatty acids (yeast) | Elovl6          | 1445062_AT<br>1417404_AT<br>1417403_AT | D |   |   |
| predicted gene 5182; acetyl-Coenzyme A carboxylase alpha                                  | Acaca           | 1434185_AT                             | D |   |   |
| sterol-C4-methyl oxidase-like                                                             | Sc4mol *        | 1423078_A_AT                           | B | + |   |
| <b>GO:0006869~lipid transport</b>                                                         |                 |                                        |   |   |   |
| apolipoprotein L 7a                                                                       | Apol7a          | 1453080_AT                             |   |   |   |
| oxysterol binding protein-like 3                                                          | Osbp13 (Orp3)   | 1438724_AT<br>1428484_AT               |   |   |   |
| phosphatidylinositol transfer protein, cytoplasmic 1                                      | Pitpnc1 (RdgB)  | 1441574_AT                             |   |   |   |
| phospholipid transfer protein                                                             | Pltp            | 1456424_S_AT                           |   |   |   |
| solute carrier family 27 (fatty acid transporter), member 2                               | Slc27a2 (Fatp2) | 1416316_AT                             | C |   |   |
| spinster homolog 2 (Drosophila)                                                           | Spns2*          | 1451601_A_AT                           |   |   |   |
| <b>GO:0055085~transmembrane transport</b>                                                 |                 |                                        |   |   |   |
| ATPase, H+ transporting, lysosomal V0 subunit D2                                          | Atp6v0d2        | 1434798_AT                             |   |   |   |
| aquaporin 4                                                                               | Aqp4            | 1434449_AT                             |   |   |   |
| predicted gene 7180; translocase of inner mitochondrial membrane                          | Timm17a         | 1426256_AT                             |   |   |   |

|                                                                                                                                                 |                                                               |                                      |  |  |   |
|-------------------------------------------------------------------------------------------------------------------------------------------------|---------------------------------------------------------------|--------------------------------------|--|--|---|
| 17a                                                                                                                                             |                                                               |                                      |  |  |   |
| predicted gene 9797;<br>translocase of inner<br>mitochondrial membrane<br>8 homolog a1 (yeast);<br>similar to small zinc<br>finger-like protein | Timm8a1                                                       | 1416345_AT                           |  |  |   |
| scavenger receptor class<br>A, member 5 (putative)                                                                                              | Scara5<br>(Ferritin<br>transporte<br>r)                       | 1451204_AT                           |  |  |   |
| similar to X-linked<br>PEST-containing<br>transporter; solute carrier<br>family 16<br>(monocarboxylic acid<br>transporters), member 2           | Slc16a2<br>(Mct8,<br>thyroid<br>hormone<br>transporte<br>r)   | 1418445_AT                           |  |  |   |
| solute carrier family 12,<br>member 7                                                                                                           | Slc12a7<br>(Kcc1, K/<br>Cl<br>transporte<br>r)                | 1418257_AT                           |  |  |   |
| solute carrier family 16<br>(monocarboxylic acid<br>transporters), member<br>10                                                                 | Slc16a10<br>(Mct10,<br>thyroid<br>hormone<br>transporte<br>r) | 1457851_AT                           |  |  |   |
| solute carrier family 22<br>(organic anion<br>transporter), member 7                                                                            | Slc22a7<br>(Oat2, uric<br>acid<br>transporte<br>r)            | 1451460_A_<br>AT                     |  |  | + |
| solute carrier family 22,<br>member 23                                                                                                          | Slc22a23<br>(Boct2)                                           | 1453004_AT                           |  |  |   |
| solute carrier family 23<br>(nucleobase<br>transporters), member 1                                                                              | Slc23a1<br>ascorbic<br>acid<br>transporte<br>r)               | 1421912_AT                           |  |  |   |
| solute carrier family 26<br>(sulfate transporter),<br>member 1                                                                                  | Slc26a1<br>(sulfuric<br>acid<br>transporte<br>r)              | 1451239_A_<br>AT<br>1458327_X_<br>AT |  |  |   |
| spinster homolog 2<br>(Drosophila)                                                                                                              | Spns2*                                                        | 1451601_A_<br>AT                     |  |  |   |

\* : Genes appearing more than two times in the functional groupings.
