# Supplementary material for: Nuclear Receptor-Mediated Alleviation of Alcoholic Fatty Liver by Polyphenols Contained in Alcoholic Beverages
Source: PubMed Central journal article supplement (PMC3911942; doi:10.1371/journal.pone.0087142), 2014-02-03
Supplement: pone.0087142.s007.pdf [file pone.0087142.s007.pdf]

Table S5. The list of 67 genes assigned to the GO-terms for 514 probe set

| Gene name                                                            | Gene symbol | probe ID                                             | Mapped panel in Fig.3 | Reported to be regulated by CAR | Similary regulated in CAR KO mice |
|----------------------------------------------------------------------|-------------|------------------------------------------------------|-----------------------|---------------------------------|-----------------------------------|
| <b>GO:0007623~circadian rhythm</b>                                   |             |                                                      |                       |                                 |                                   |
| D site albumin promoter binding protein                              | Dbp         | 1418174_AT<br>1438211_S_AT                           | H                     |                                 | +                                 |
| period homolog 1 (Drosophila)                                        | Per1        | 1449851_AT                                           | H                     |                                 |                                   |
| period homolog 2 (Drosophila)                                        | Per2        | 1417602_AT                                           | H                     |                                 |                                   |
| period homolog 3 (Drosophila)                                        | Per3        | 1458176_AT<br>1441445_AT<br>1442243_AT<br>1421087_AT | H                     |                                 |                                   |
| similar to mKIAA0658 protein; cryptochrome 2 (photolyase-like)       | Cry2        | 1426383_AT                                           | H                     |                                 |                                   |
| <b>GO:0008202~steroid metabolic process</b>                          |             |                                                      |                       |                                 |                                   |
| 24-dehydrocholesterol reductase                                      | Dhcr24      | 1451895_A_AT                                         | B                     | +                               |                                   |
| StAR-related lipid transfer (START) domain containing 5              | Stard5      | 1422822_AT<br>1450769_S_AT                           |                       |                                 |                                   |
| aldo-keto reductase family 1, member D1                              | Akr1d1      | 1455100_AT<br>1425771_AT                             | B                     | +                               |                                   |
| ceroid-lipofuscinosis, neuronal 8                                    | Cln8        | 1448455_AT                                           |                       |                                 |                                   |
| low density lipoprotein receptor                                     | Ldlr        | 1421821_AT                                           |                       | +                               |                                   |
| nuclear receptor subfamily 3, group C, member 1                      | Nr3c1(GR)*  | 1460303_AT<br>1457635_S_AT                           |                       |                                 |                                   |
| oxysterol binding protein-like 1A                                    | Osbpl1a     | 1460192_AT                                           |                       |                                 |                                   |
| oxysterol binding protein-like 3                                     | Osbpl3      | 1428484_AT<br>1438724_AT                             |                       |                                 |                                   |
| serine (or cysteine) peptidase inhibitor, clade A, member 6          | Serpina6    | 1448506_AT                                           |                       |                                 |                                   |
| solute carrier family 37 (glucose-6-phosphate transporter), member 4 | Slc37a4     | 1417042_AT                                           | A                     |                                 |                                   |
| <b>GO:0043603~cellular amide metabolic process</b>                   |             |                                                      |                       |                                 |                                   |
| carbamoyl-phosphate synthetase 1                                     | Cps1*       | 1455540_AT                                           | I                     |                                 |                                   |
| dicarbonyl L-xylulose reductase                                      | Dcxr        | 1419456_AT                                           |                       |                                 |                                   |
| kynurenine 3-monooxygenase (kynurenine 3-hydroxylase)                | Kmo*        | 1418998_AT                                           | F                     |                                 |                                   |
| nicotinamide phosphoribosyltransferase                               | Nampt       | 1455320_AT                                           | F                     |                                 |                                   |
| ornithine transcarbamylase                                           | Otc*        | 1436615_A_AT                                         | I                     |                                 |                                   |
| <b>GO:0044271~nitrogen compound biosynthetic process</b>             |             |                                                      |                       |                                 |                                   |
| ATP synthase, H+                                                     | Atp5c1      | 1438809_AT                                           |                       |                                 |                                   |

|                                                                                                                                     |                  |                              |   |  |   |
|-------------------------------------------------------------------------------------------------------------------------------------|------------------|------------------------------|---|--|---|
| transporting, mitochondrial F1 complex, gamma polypeptide 1                                                                         |                  |                              |   |  |   |
| GTP cyclohydrolase 1                                                                                                                | Gch1*            | 1429692_S_AT                 |   |  |   |
| adenosine kinase                                                                                                                    | Adk              | 1438292_X_AT                 |   |  |   |
| antizyme inhibitor 1                                                                                                                | Azin1            | 1450714_AT                   |   |  | + |
| betaine-homocysteine methyltransferase                                                                                              | Bhmt*            | 1450624_AT                   | G |  |   |
| cDNA sequence BC016495(Nrk1)                                                                                                        | BC016495 (Nrk1)* | 1425646_AT                   | F |  |   |
| carbamoyl-phosphate synthetase 1                                                                                                    | Cps1*            | 1455540_AT                   | I |  |   |
| dihydropyrimidine dehydrogenase                                                                                                     | Dpyd             | 1427945_AT                   |   |  |   |
| ethanolamine kinase 2; similar to putative ethanolamine kinase                                                                      | Etnk2            | 1437040_AT                   |   |  |   |
| kynurenine 3-monooxygenase (kynurenine 3-hydroxylase)                                                                               | Kmo*             | 1418998_AT                   | F |  |   |
| methionine adenosyltransferase II, beta                                                                                             | Mat2b*           | 1448196_AT                   | G |  |   |
| methylenetetrahydrofolate dehydrogenase (NADP+ dependent), methenyltetrahydrofolate cyclohydrolase, formyltetrahydrofolate synthase | Mthfd1*          | 1436704_X_AT<br>1415917_AT   | G |  |   |
| nicotinamide phosphoribosyltransferase                                                                                              | Nampt*           | 1455320_AT                   | F |  |   |
| ornithine transcarbamylase                                                                                                          | Otc*             | 1436615_A_AT                 | I |  |   |
| phosphoribosylaminoimidazole carboxylase, phosphoribosylaminoimidazole, succinocarboxamide synthetase; predicted gene 8445          | Paics            | 1436298_X_AT                 |   |  |   |
| <b>GO:0042364~water-soluble vitamin biosynthetic process</b>                                                                        |                  |                              |   |  |   |
| cDNA sequence BC016495(Nrk1)                                                                                                        | BC016495 (Nrk1)* | 1425646_AT                   |   |  |   |
| kynurenine 3-monooxygenase (kynurenine 3-hydroxylase)                                                                               | Kmo*             | 1418998_AT                   | F |  |   |
| nicotinamide phosphoribosyltransferase                                                                                              | Nampt*           | 1455320_AT                   | F |  |   |
| pyridoxal (pyridoxine, vitamin B6) kinase                                                                                           | Pdxk             | 1427929_A_AT<br>1427931_S_AT |   |  |   |
| <b>GO:0009108~coenzyme biosynthetic process</b>                                                                                     |                  |                              |   |  |   |
| GTP cyclohydrolase                                                                                                                  | Gch1*            | 1429692_S_AT                 |   |  |   |

|                                                                                                                                     |                  |                                            |   |            |  |
|-------------------------------------------------------------------------------------------------------------------------------------|------------------|--------------------------------------------|---|------------|--|
| 1                                                                                                                                   |                  |                                            |   |            |  |
| cDNA sequence BC016495(Nrk1)                                                                                                        | BC016495 (Nrk1)* | 1425646_AT                                 | F |            |  |
| dihydrolipoamide branched chain transacylase E2                                                                                     | Dbt              | 1449118_AT                                 |   |            |  |
| kynurenine 3-monooxygenase (kynurenine 3-hydroxylase)                                                                               | Kmo*             | 1418998_AT                                 | F |            |  |
| methylenetetrahydrofolate dehydrogenase (NADP+ dependent), methenyltetrahydrofolate cyclohydrolase, formyltetrahydrofolate synthase | Mthfd1*          | 1415917_AT<br>1436704_X_AT                 | G |            |  |
| nicotinamide phosphoribosyltransferase                                                                                              | Nampt*           | 1455320_AT                                 | F |            |  |
| <b>GO:0030203~glycosaminoglycan metabolic process</b>                                                                               |                  |                                            |   |            |  |
| decorin                                                                                                                             | Dcn              | 1449368_AT                                 |   |            |  |
| glucosamine (N-acetyl)-6-sulfatase                                                                                                  | Gns              | 1433488_X_AT                               |   |            |  |
| hexosaminidase B                                                                                                                    | Hexb             | 1437874_S_AT                               |   |            |  |
| hyaluronoglucosaminidase 2                                                                                                          | Hyal2            | 1448679_AT                                 |   |            |  |
| inter-alpha (globulin) inhibitor H5                                                                                                 | Itih5            | 1436755_AT                                 |   |            |  |
| <b>GO:0046653~tetrahydrofolate metabolic process</b>                                                                                |                  |                                            |   |            |  |
| GTP cyclohydrolase 1                                                                                                                | Gch1*            | 1429692_S_AT                               |   |            |  |
| pipecolic acid oxidase                                                                                                              | Pipox            | 1449374_AT                                 |   |            |  |
| similar to Aldehyde dehydrogenase 1 family, member L1; aldehyde dehydrogenase 1 family, member L1                                   | Aldh111          | 1424400_A_AT                               | G |            |  |
| <b>GO:0006631~fatty acid metabolic process</b>                                                                                      |                  |                                            |   |            |  |
| 3-oxoacyl-ACP synthase, mitochondrial                                                                                               | Oxsm             | 1455395_AT                                 | D |            |  |
| NADH dehydrogenase (ubiquinone) 1, alpha/beta subcomplex, 1; predicted gene 4459                                                    | Ndufab1          | 1447919_X_AT                               |   |            |  |
| acetyl-Coenzyme A acyltransferase 1A                                                                                                | Acaa1a           | 1424451_AT<br>1416947_S_AT<br>1456011_X_AT | C |            |  |
| acyl-CoA synthetase medium-chain family member 5                                                                                    | Acsm5            | 1437662_AT                                 | C |            |  |
| acyl-Coenzyme A oxidase 1, palmitoyl                                                                                                | Acox1            | 1416409_AT<br>1416408_AT                   | C | + opposite |  |
| carnitine palmitoyltransferase 1a, liver                                                                                            | Cpt1a            | 1434866_X_AT<br>1438156_X_AT               | C | +          |  |
| cytochrome P450, family 2, subfamily d,                                                                                             | Cyp2d2           | 1419039_AT<br>1419040_AT                   |   |            |  |

|                                                                                                                                     |                 |                                        |   |  |  |
|-------------------------------------------------------------------------------------------------------------------------------------|-----------------|----------------------------------------|---|--|--|
| polypeptide 22                                                                                                                      |                 |                                        |   |  |  |
| fatty acid desaturase domain family, member 6                                                                                       | Fads6           | 1443904_AT                             |   |  |  |
| hydroxysteroid (17-beta) dehydrogenase 4                                                                                            | Hsd17b4         | 1455777_X_AT                           | C |  |  |
| peroxisome proliferator activated receptor alpha                                                                                    | Ppara           | 1457721_AT<br>1439675_AT<br>1449051_AT |   |  |  |
| phytanoyl-CoA hydroxylase                                                                                                           | Phyh            | 1460194_AT                             | C |  |  |
| protein kinase, AMP-activated, gamma 2 non-catalytic subunit                                                                        | Prkag2          | 1423831_AT                             |   |  |  |
| <b>GO:0006099~tricarboxylic acid cycle</b>                                                                                          |                 |                                        |   |  |  |
| aconitase 1                                                                                                                         | Aco1            | 1456728_X_AT                           | A |  |  |
| fumarate hydratase 1                                                                                                                | Fh1             | 1424828_A_AT                           | A |  |  |
| isocitrate dehydrogenase 2 (NADP+), mitochondrial                                                                                   | Idh2            | 1458383_AT                             | A |  |  |
| malate dehydrogenase 2, NAD (mitochondrial)                                                                                         | Mdh2            | 1433984_A_AT                           | A |  |  |
| <b>GO:0006446~regulation of translational initiation</b>                                                                            |                 |                                        |   |  |  |
| ankyrin repeat and KH domain containing 1; eukaryotic translation initiation factor 4E binding protein 3                            | Ankhd1/Eif4ebp3 | 1453023_AT                             |   |  |  |
| poly(A) binding protein interacting protein 2B                                                                                      | Paip2b          | 1451125_AT                             |   |  |  |
| protein phosphatase 1, regulatory (inhibitor) subunit 15b                                                                           | Ppp1r15b        | 1426798_A_AT                           |   |  |  |
| similar to Gene model 672, (NCBI); predicted gene 672                                                                               | Gm672           | 1436047_AT                             |   |  |  |
| <b>GO:0006555~methionine metabolic process</b>                                                                                      |                 |                                        |   |  |  |
| betaine-homocysteine methyltransferase                                                                                              | Bhmt*           | 1450624_AT                             | G |  |  |
| glycine N-methyltransferase                                                                                                         | Gnmt*           | 1417422_AT                             | G |  |  |
| methylenetetrahydrofolate dehydrogenase (NADP+ dependent), methenyltetrahydrofolate cyclohydrolase, formyltetrahydrofolate synthase | Mthfd1*         | 1436704_X_AT<br>1415917_AT             | G |  |  |
| <b>GO:0046500~S-adenosylmethionine metabolic process</b>                                                                            |                 |                                        |   |  |  |
| glycine N-methyltransferase                                                                                                         | Gnmt*           | 1417422_AT                             | G |  |  |
| methionine adenosyltransferase II, beta                                                                                             | Mat2b*          | 1448196_AT                             | G |  |  |
| thiopurine methyltransferase                                                                                                        | Tpmt            | 1456273_X_AT<br>1438087_AT             | G |  |  |
| <b>GO:0006111~regulation of gluconeogenesis</b>                                                                                     |                 |                                        |   |  |  |

|                                                                  |                |                            |   |  |  |
|------------------------------------------------------------------|----------------|----------------------------|---|--|--|
| glycine<br>N-methyltransferase                                   | Gnmt*          | 1417422_AT                 | G |  |  |
| hepatic nuclear factor<br>4, alpha                               | Hnf4a          | 1427000_AT                 |   |  |  |
| nuclear receptor<br>subfamily 3, group C,<br>member 1            | Nr3c1(G<br>R)* | 1457635_S_AT<br>1460303_AT |   |  |  |
| <b>GO:0019441~tryptophan catabolic process to<br/>kynurenine</b> |                |                            |   |  |  |
| arylformamidase                                                  | Afmid          | 1428885_AT<br>1452944_AT   | F |  |  |
| indoleamine<br>2,3-dioxygenase 2                                 | Ido2           | 1425778_AT                 | F |  |  |
| tryptophan<br>2,3-dioxygenase                                    | Tdo2           | 1455770_AT                 | F |  |  |

\* : Genes appearing more than two times in the functional groupings.
