# Supplementary material for: Nuclear Receptor-Mediated Alleviation of Alcoholic Fatty Liver by Polyphenols Contained in Alcoholic Beverages
Source: PubMed Central journal article supplement (PMC3911942; doi:10.1371/journal.pone.0087142), 2014-02-03
Supplement: pone.0087142.s008.pdf [file pone.0087142.s008.pdf]

Table S6. The list of 253 genes assigned to the GO-terms for 742 probe set

| Gene name                                                                                                                                                                                            | Gene symbol | probe ID                               |
|------------------------------------------------------------------------------------------------------------------------------------------------------------------------------------------------------|-------------|----------------------------------------|
| <b>GO:0044087~regulation of cellular component biogenesis</b>                                                                                                                                        |             |                                        |
| KN motif and ankyrin repeat domains 2                                                                                                                                                                | Kank2       | 1425991_A_AT                           |
| actin related protein 2/3 complex, subunit 1B                                                                                                                                                        | Arpc1b      | 1416226_AT                             |
| agrin                                                                                                                                                                                                | Agm*        | 1426670_AT                             |
| capping protein (actin filament) muscle Z-line, alpha 1; similar to capping protein (actin filament) muscle Z-line, alpha 1; predicted gene 3608; predicted gene 5920                                | Capza1      | 1439455_X_AT<br>1452038_AT             |
| phosphatase and tensin homolog                                                                                                                                                                       | Pten*       | 1455728_AT<br>1422553_AT               |
| predicted gene 5492; actin related protein 2/3 complex, subunit 2                                                                                                                                    | Arpc2       | 1437148_AT                             |
| predicted gene 8545; microtubule-associated protein, RP/EB family, member 1; similar to Microtubule-associated protein RP/EB family member 1 (APC-binding protein EB1) (End-binding protein 1) (EB1) | Mapre1      | 1450740_A_AT<br>1422764_AT             |
| similar to adenomatosis polyposis coli; adenomatosis polyposis coli                                                                                                                                  | Apc         | 1435543_AT                             |
| tropomodulin 3                                                                                                                                                                                       | Tmod3       | 1438556_A_AT                           |
| <b>GO:0043687~post-translational protein modification</b>                                                                                                                                            |             |                                        |
| B-cell translocation gene 1, anti-proliferative; similar to myocardial vascular inhibition factor                                                                                                    | Btg1*       | 1426083_A_AT                           |
| Bmi1 polycomb ring finger oncogene                                                                                                                                                                   | Bmi1*       | 1417493_AT                             |
| CREB binding protein                                                                                                                                                                                 | Crebbp*     | 1436983_AT                             |
| ERO1-like (S. cerevisiae)                                                                                                                                                                            | Ero1*       | 1449324_AT                             |
| ERO1-like beta (S. cerevisiae)                                                                                                                                                                       | Ero1lb*     | 1434714_AT<br>1425705_A_AT             |
| F-box protein 4                                                                                                                                                                                      | Fbxo4*      | 1427121_AT                             |
| G1 to S phase transition 1                                                                                                                                                                           | Gspt1*      | 1452168_X_AT<br>1426736_AT             |
| HECT, UBA and WWE domain containing 1                                                                                                                                                                | Huwe1*      | 1415703_AT                             |
| OTU domain containing 7B                                                                                                                                                                             | Otud7b      | 1429139_AT                             |
| PCTAIRE-motif protein kinase 1                                                                                                                                                                       | Pctk1       | 1438625_S_AT                           |
| PDLIM1 interacting kinase 1 like                                                                                                                                                                     | Pdik1l      | 1437175_AT                             |
| PEST proteolytic signal containing nuclear protein                                                                                                                                                   | Pcnp*       | 1452735_AT                             |
| SMT3 suppressor of mif two 3 homolog 3 (yeast)                                                                                                                                                       | Sumo3       | 1422457_S_AT                           |
| TAO kinase 1                                                                                                                                                                                         | Taok1       | 1424657_AT                             |
| adrenergic receptor kinase, beta 1                                                                                                                                                                   | Adrbk1      | 1451992_AT                             |
| cAMP responsive element binding protein 1                                                                                                                                                            | Creb1*      | 1452901_AT                             |
| coagulation factor II (thrombin) receptor                                                                                                                                                            | F2r         | 1437308_S_AT                           |
| dimethylarginine dimethylaminohydrolase 1                                                                                                                                                            | Ddah1       | 1455400_AT<br>1429299_AT<br>1454995_AT |
| dual specificity phosphatase 1                                                                                                                                                                       | Dusp1       | 1448830_AT                             |
| dual specificity phosphatase 11 (RNA/RNP complex 1-interacting)                                                                                                                                      | Dusp11      | 1452594_AT                             |
| eukaryotic translation termination factor 1                                                                                                                                                          | Etf1*       | 1451208_AT                             |
| histone deacetylase 2                                                                                                                                                                                | Hdac2*      | 1445684_S_AT                           |
| interleukin-1 receptor-associated kinase 2                                                                                                                                                           | Irak2       | 1436507_AT                             |
| myeloid/lymphoid or mixed-lineage leukemia 5                                                                                                                                                         | Mll5*       | 1439108_AT                             |
| nuclear receptor-binding SET-domain protein 1                                                                                                                                                        | Nsd1*       | 1435088_AT                             |
| phosphatase and tensin homolog                                                                                                                                                                       | Pten*       | 1422553_AT<br>1455728_AT               |
| predicted gene 13416; WW domain containing E3 ubiquitin protein ligase 1                                                                                                                             | Wwp1*       | 1427097_AT                             |
| predicted gene 13422; protein tyrosine phosphatase 4a2                                                                                                                                               | Ptp4a2      | 1460707_AT                             |
| predicted gene 5801; ubiquitin-conjugating enzyme E2, J2 homolog (yeast)                                                                                                                             | Ube2j2      | 1426138_A_AT                           |
| protein inhibitor of activated STAT 2                                                                                                                                                                | Pias2       | 1426456_A_AT                           |
| protein kinase N2                                                                                                                                                                                    | Pkn2        | 1437296_AT                             |

|                                                                                                                             |                   |                                        |
|-----------------------------------------------------------------------------------------------------------------------------|-------------------|----------------------------------------|
| protein kinase, AMP-activated, alpha 2 catalytic subunit                                                                    | Prkaa2            | 1429463_AT<br>1429464_AT<br>1434766_AT |
| protein phosphatase 1G (formerly 2C), magnesium-dependent, gamma isoform                                                    | Ppm1g             | 1416792_AT                             |
| protein phosphatase 6, catalytic subunit                                                                                    | Ppp6c             | 1424346_AT                             |
| protein tyrosine phosphatase, non-receptor type 11                                                                          | Ptpn11            | 1427699_A_AT                           |
| protein tyrosine phosphatase, receptor type, F                                                                              | Ptprf             | 1420842_AT                             |
| protein tyrosine phosphatase, receptor type, K                                                                              | Ptprk             | 1423277_AT                             |
| quiescin Q6 sulfhydryl oxidase 1                                                                                            | Qsox1*            | 1420832_AT                             |
| ribosomal protein S6 kinase, polypeptide 1                                                                                  | Rps6kb1           | 1460705_AT<br>1454956_AT               |
| ring finger protein 2                                                                                                       | Rnf2*             | 1451519_AT                             |
| serine/threonine kinase 24 (STE20 homolog, yeast)                                                                           | Stk24             | 1426247_AT                             |
| seven in absentia 2                                                                                                         | Siah2*            | 1448170_AT                             |
| similar to ubiquitin-conjugating enzyme UbcM2; ubiquitin-conjugating enzyme E2E 3, UBC4/5 homolog (yeast)                   | Ube2e3            | 1448670_AT                             |
| suppressor of zeste 12 homolog (Drosophila)                                                                                 | Suz12*            | 1452364_AT                             |
| testis specific protein kinase 1                                                                                            | Tesk1             | 1450662_AT                             |
| transformation/transcription domain-associated protein                                                                      | Trrap*            | 1416532_AT                             |
| transglutaminase 2, C polypeptide                                                                                           | Tgm2*             | 1433428_X_AT<br>1417500_A_AT           |
| ubiquitin specific peptidase 12; predicted gene 8902                                                                        | Usp12             | 1434483_AT                             |
| ubiquitin specific peptidase 9, X chromosome                                                                                | Usp9x             | 1450039_AT                             |
| ubiquitin-conjugating enzyme E2D 2; predicted gene 9762                                                                     | Ube2d2            | 1416477_AT                             |
| ubiquitin-conjugating enzyme E2G 2                                                                                          | Ube2g2*           | 1417032_AT                             |
| ubiquitin-conjugating enzyme E2K (UBC1 homolog, yeast)                                                                      | Ube2k             | 1417186_AT                             |
| v-raf-leukemia viral oncogene 1                                                                                             | Raf1              | 1425419_A_AT                           |
| <b>GO:0006467~protein thiol-disulfide exchange</b>                                                                          |                   |                                        |
| ERO1-like (S. cerevisiae)                                                                                                   | Ero1l*            | 1449324_AT                             |
| ERO1-like beta (S. cerevisiae)                                                                                              | Ero1lb*           | 1434714_AT<br>1425705_A_AT             |
| quiescin Q6 sulfhydryl oxidase 1                                                                                            | Qsox1*            | 1420832_AT                             |
| <b>GO:0006413~translational initiation</b>                                                                                  |                   |                                        |
| eukaryotic translation initiation factor 1B                                                                                 | Eif1b             | 1428272_AT                             |
| eukaryotic translation initiation factor 3, subunit A                                                                       | Eif3a             | 1416661_AT                             |
| eukaryotic translation initiation factor 3, subunit C; similar to Eukaryotic translation initiation factor 3, subunit 8     | Eif3c             | 1415859_AT                             |
| hypothetical LOC630527; eukaryotic translation initiation factor 4E; similar to eukaryotic translation initiation factor 4E | Eif4e             | 1450908_AT                             |
| similar to Eif2s2 protein; eukaryotic translation initiation factor 2, subunit 2 (beta)                                     | Eif2s2            | 1456617_A_AT<br>1417713_AT             |
| similar to Eukaryotic translation initiation factor 5; eukaryotic translation initiation factor 5                           | Eif5              | 1454664_A_AT                           |
| <b>GO:0006520~cellular amino acid metabolic process</b>                                                                     |                   |                                        |
| 5,10-methylenetetrahydrofolate reductase                                                                                    | Mthfr             | 1434087_AT                             |
| RIKEN cDNA 3930401K13 gene                                                                                                  | 3930401<br>K13Rik | 1451994_S_AT                           |
| RIKEN cDNA 4930402E16 gene                                                                                                  | 4930402<br>E16Rik | 1459869_X_AT                           |
| alanyl-tRNA synthetase                                                                                                      | Aars              | 1451083_S_AT<br>1423685_AT             |
| glutamate dehydrogenase 1; predicted gene 5902                                                                              | Glud1             | 1448253_AT                             |
| glutamate-cysteine ligase, catalytic subunit                                                                                | Gclc*             | 1455959_S_AT<br>1424296_AT             |
| glutamate-cysteine ligase, modifier subunit                                                                                 | Gclm              | 1418627_AT                             |
| glutamine fructose-6-phosphate transaminase 1                                                                               | Gfpt1             | 1428715_AT                             |
| glycine decarboxylase                                                                                                       | Gldc              | 1416049_AT                             |
| guanine monophosphate synthetase; predicted gene 7282                                                                       | Gmps              | 1433567_AT                             |
| isoleucine-tRNA synthetase                                                                                                  | Iars              | 1452154_AT<br>1426705_S_AT             |
| leucyl-tRNA synthetase                                                                                                      | Lars              | 1448403_AT                             |
| methionine-tRNA synthetase                                                                                                  | Mars              | 1455951_AT                             |

|                                                                                                         |                    |                              |
|---------------------------------------------------------------------------------------------------------|--------------------|------------------------------|
| seryl-aminoacyl-tRNA synthetase                                                                         | Sars               | 1452000_S_AT<br>1426257_A_AT |
| threonyl-tRNA synthetase                                                                                | Tars               | 1460323_AT                   |
| <b>GO:0048008~platelet-derived growth factor receptor signaling pathway</b>                             |                    |                              |
| RIKEN cDNA 6820431F20 gene                                                                              | 6820431<br>F20Rik  | 1436740_AT                   |
| myosin IE                                                                                               | Myo1e              | 1428509_AT                   |
| phosphatase and tensin homolog                                                                          | Pten*              | 1455728_AT<br>1422553_AT     |
| platelet-derived growth factor, C polypeptide                                                           | Pdgfc              | 1419123_A_AT                 |
| sphingosine phosphate lyase 1                                                                           | Sgpl1              | 1415892_AT                   |
| <b>GO:0006479~protein amino acid methylation</b>                                                        |                    |                              |
| B-cell translocation gene 1, anti-proliferative; similar to myocardial vascular inhibition factor       | Btg1*              | 1426083_A_AT                 |
| G1 to S phase transition 1                                                                              | Gspt1*             | 1452168_X_AT<br>1426736_AT   |
| eukaryotic translation termination factor 1                                                             | Etf1*              | 1451208_AT                   |
| myeloid/lymphoid or mixed-lineage leukemia 5                                                            | Mll5*              | 1439108_AT                   |
| nuclear receptor-binding SET-domain protein 1                                                           | Nsd1*              | 1435088_AT                   |
| suppressor of zeste 12 homolog (Drosophila)                                                             | Suz12*             | 1452364_AT                   |
| <b>GO:0007435~salivary gland morphogenesis</b>                                                          |                    |                              |
| cadherin 1                                                                                              | Cdh1               | 1448261_AT                   |
| dystroglycan 1                                                                                          | Dag1               | 1426778_AT<br>1426779_X_AT   |
| neuropilin 1                                                                                            | Nrp1               | 1457198_AT                   |
| transglutaminase 2, C polypeptide                                                                       | Tgm2*              | 1433428_X_AT<br>1417500_A_AT |
| twisted gastrulation homolog 1 (Drosophila)                                                             | Twsg1              | 1450388_S_AT                 |
| <b>GO:0051258~protein polymerization</b>                                                                |                    |                              |
| fibrinogen alpha chain                                                                                  | Fga                | 1424279_AT                   |
| fibrinogen beta chain                                                                                   | Fgb                | 1428079_AT                   |
| fibrinogen gamma chain                                                                                  | Fgg                | 1416025_AT                   |
| tubulin, alpha 4A                                                                                       | Tuba4a             | 1417374_AT<br>1417373_A_AT   |
| tubulin, beta 2c, pseudogene 1; tubulin, beta 2C; tubulin, beta 2c, pseudogene 2                        | Tubb2c             | 1423642_AT                   |
| tubulin, beta 5                                                                                         | Tubb5              | 1416256_A_AT                 |
| <b>GO:0016567~protein ubiquitination</b>                                                                |                    |                              |
| Bmi1 polycomb ring finger oncogene                                                                      | Bmi1*              | 1417493_AT                   |
| F-box protein 4                                                                                         | Fbxo4*             | 1427121_AT                   |
| G1 to S phase transition 1                                                                              | Gspt1*             | 1452168_X_AT<br>1426736_AT   |
| HECT, UBA and WWE domain containing 1                                                                   | Huwe1*             | 1415703_AT                   |
| PEST proteolytic signal containing nuclear protein                                                      | Pcnp*              | 1452735_AT                   |
| predicted gene 13416; WW domain containing E3 ubiquitin protein ligase 1                                | Wwp1*              | 1427097_AT                   |
| ring finger protein 2                                                                                   | Rnf2*              | 1451519_AT                   |
| seven in absentia 2                                                                                     | Siah2*             | 1448170_AT                   |
| suppressor of zeste 12 homolog (Drosophila)                                                             | Suz12*             | 1452364_AT                   |
| <b>GO:0008380~RNA splicing</b>                                                                          |                    |                              |
| PRP40 pre-mRNA processing factor 40 homolog A (yeast)                                                   | Prpf40a*           | 1420917_AT                   |
| PRP6 pre-mRNA splicing factor 6 homolog (yeast)                                                         | Prpf6*             | 1424036_AT<br>1454789_X_AT   |
| RIKEN cDNA 0610009D07 gene                                                                              | 0610009<br>D07Rik* | 1417054_A_AT                 |
| RIKEN cDNA 3300001P08 gene                                                                              | 3300001<br>P08Rik* | 1451485_AT                   |
| expressed sequence AU014645; nuclear cap binding protein subunit 1                                      | Ncbp1*             | 1433663_S_AT                 |
| heterogeneous nuclear ribonucleoprotein K; predicted gene 7964                                          | Hnrnpk*            | 1448176_A_AT                 |
| predicted gene 10232; predicted gene 6978; U2 small nuclear ribonucleoprotein auxiliary factor (U2AF) 1 | U2af1*             | 1422509_AT                   |

|                                                                                                                                                                                                                                                                                                                                                                                   |                |                                          |
|-----------------------------------------------------------------------------------------------------------------------------------------------------------------------------------------------------------------------------------------------------------------------------------------------------------------------------------------------------------------------------------|----------------|------------------------------------------|
| predicted gene 13886; TAR DNA binding protein                                                                                                                                                                                                                                                                                                                                     | Tardbp*        | 1423723_S_AT                             |
| predicted gene 5446; similar to FUS interacting protein (serine-arginine rich) 1; FUS interacting protein (serine-arginine rich) 1                                                                                                                                                                                                                                                | Fusip1*        | 1418527_A_AT                             |
| predicted gene 7509; splicing factor, arginine/serine-rich 3 (SRp20); similar to MGC89287 protein; predicted gene 9761; predicted gene 7083                                                                                                                                                                                                                                       | Sfrs3*         | 1454993_A_AT                             |
| predicted gene 8696; predicted gene 5616; predicted gene 8948; NHP2 non-histone chromosome protein 2-like 1 (S. cerevisiae); predicted gene 13642; predicted gene 7042; similar to NHP2 non-histone chromosome protein 2-like 1; similar to Nhp2 non-histone chromosome protein 2-like 1; predicted gene 13311; similar to nuclear protein-NHP2-like protein; predicted gene 6637 | Nhp2l1*        | 1416973_AT                               |
| serine/arginine repetitive matrix 2; similar to Serine/arginine repetitive matrix protein 2; similar to retinitis pigmentosa GTPase regulator                                                                                                                                                                                                                                     | Srrm2*         | 1437638_AT                               |
| serine/threonine kinase receptor associated protein                                                                                                                                                                                                                                                                                                                               | Strap*         | 1416566_AT                               |
| similar to protein phosphatase 4, regulatory subunit 2; similar to Protein phosphatase 4, regulatory subunit 2; protein phosphatase 4, regulatory subunit 2                                                                                                                                                                                                                       | Ppp4r2*        | 1433850_AT                               |
| splicing factor proline/glutamine rich (polypyrimidine tract binding protein associated); similar to PTB-associated splicing factor                                                                                                                                                                                                                                               | Sfpq*          | 1423795_AT<br>1438458_A_AT<br>1436898_AT |
| splicing factor, arginine/serine rich 9                                                                                                                                                                                                                                                                                                                                           | Sfrs9*         | 1417727_AT                               |
| splicing factor, arginine/serine-rich 2 (SC-35)                                                                                                                                                                                                                                                                                                                                   | Sfrs2*         | 1415807_S_AT                             |
| splicing factor, arginine/serine-rich 7                                                                                                                                                                                                                                                                                                                                           | Sfrs7*         | 1424883_S_AT                             |
| synaptotagmin binding, cytoplasmic RNA interacting protein                                                                                                                                                                                                                                                                                                                        | Syncrip*       | 1422769_AT                               |
| transformer 2 beta homolog (Drosophila); predicted gene 6439                                                                                                                                                                                                                                                                                                                      | Tra2b*         | 1419543_A_AT                             |
| ubiquitin specific peptidase 39                                                                                                                                                                                                                                                                                                                                                   | Usp39*         | 1460209_AT<br>1437007_X_AT               |
| <b>GO:0006397~mRNA processing</b>                                                                                                                                                                                                                                                                                                                                                 |                |                                          |
| CCR4-NOT transcription complex, subunit 6-like                                                                                                                                                                                                                                                                                                                                    | Cnot6l         | 1425481_AT                               |
| PRP40 pre-mRNA processing factor 40 homolog A (yeast)                                                                                                                                                                                                                                                                                                                             | Prpf40a*       | 1420917_AT                               |
| PRP6 pre-mRNA splicing factor 6 homolog (yeast)                                                                                                                                                                                                                                                                                                                                   | Prpf6*         | 1454789_X_AT<br>1424036_AT               |
| RIKEN cDNA 0610009D07 gene                                                                                                                                                                                                                                                                                                                                                        | 0610009D07Rik* | 1417054_A_AT                             |
| RIKEN cDNA 3300001P08 gene                                                                                                                                                                                                                                                                                                                                                        | 3300001P08Rik* | 1451485_AT                               |
| RNA binding motif protein 25                                                                                                                                                                                                                                                                                                                                                      | Rbm25          | 1425523_AT                               |
| apolipoprotein B mRNA editing enzyme, catalytic polypeptide 1                                                                                                                                                                                                                                                                                                                     | Apobec1        | 1451755_A_AT                             |
| cleavage and polyadenylation specific factor 2                                                                                                                                                                                                                                                                                                                                    | Cpsf2          | 1420937_AT                               |
| expressed sequence AU014645; nuclear cap binding protein subunit 1                                                                                                                                                                                                                                                                                                                | Ncbp1*         | 1433663_S_AT                             |
| heterogeneous nuclear ribonucleoprotein K; predicted gene 7964                                                                                                                                                                                                                                                                                                                    | Hnrnpk*        | 1448176_A_AT                             |
| heterogeneous nuclear ribonucleoprotein L-like; glutathione peroxidase 4                                                                                                                                                                                                                                                                                                          | Hnrpl          | 1425255_S_AT                             |
| poly (A) polymerase alpha                                                                                                                                                                                                                                                                                                                                                         | Papola         | 1455836_AT                               |
| poly(A) binding protein, nuclear 1                                                                                                                                                                                                                                                                                                                                                | Pabpn1         | 1422849_A_AT<br>1422848_A_AT             |
| predicted gene 10232; predicted gene 6978; U2 small nuclear ribonucleoprotein auxiliary factor (U2AF) 1                                                                                                                                                                                                                                                                           | U2af1*         | 1422509_AT                               |
| predicted gene 13886; TAR DNA binding protein                                                                                                                                                                                                                                                                                                                                     | Tardbp*        | 1423723_S_AT                             |
| predicted gene 5446; similar to FUS interacting protein (serine-arginine rich) 1; FUS interacting protein (serine-arginine rich) 1                                                                                                                                                                                                                                                | Fusip1*        | 1418527_A_AT                             |
| predicted gene 7509; splicing factor, arginine/serine-rich 3 (SRp20); similar to MGC89287 protein; predicted gene 9761; predicted gene 7083                                                                                                                                                                                                                                       | Sfrs3*         | 1454993_A_AT                             |
| predicted gene 8696; predicted gene 5616; predicted gene 8948; NHP2 non-histone chromosome protein 2-like 1 (S. cerevisiae); predicted gene 13642; predicted gene 7042; similar                                                                                                                                                                                                   | Nhp2l1*        | 1416973_AT                               |

|                                                                                                                                                                                                   |          |                                          |
|---------------------------------------------------------------------------------------------------------------------------------------------------------------------------------------------------|----------|------------------------------------------|
| to NHP2 non-histone chromosome protein 2-like 1; similar to Nhp2 non-histone chromosome protein 2-like 1; predicted gene 13311; similar to nuclear protein-NHP2-like protein; predicted gene 6637 |          |                                          |
| serine/arginine repetitive matrix 2; similar to Serine/arginine repetitive matrix protein 2; similar to retinitis pigmentosa GTPase regulator                                                     | Srrm2*   | 1437638_AT                               |
| serine/threonine kinase receptor associated protein                                                                                                                                               | Strap*   | 1416566_AT                               |
| similar to protein phosphatase 4, regulatory subunit 2; similar to Protein phosphatase 4, regulatory subunit 2; protein phosphatase 4, regulatory subunit 2                                       | Ppp4r2*  | 1433850_AT                               |
| splicing factor proline/glutamine rich (polypyrimidine tract binding protein associated); similar to PTB-associated splicing factor                                                               | Sfpq*    | 1436898_AT<br>1438458_A_AT<br>1423795_AT |
| splicing factor, arginine/serine rich 9                                                                                                                                                           | Sfrs9*   | 1417727_AT                               |
| splicing factor, arginine/serine-rich 2 (SC-35)                                                                                                                                                   | Sfrs2*   | 1415807_S_AT                             |
| splicing factor, arginine/serine-rich 7                                                                                                                                                           | Sfrs7*   | 1424883_S_AT                             |
| stem-loop binding protein; predicted gene 8396                                                                                                                                                    | Slbp     | 1460168_AT                               |
| synaptotagmin binding, cytoplasmic RNA interacting protein                                                                                                                                        | Syncrip* | 1422769_AT                               |
| transformer 2 beta homolog (Drosophila); predicted gene 6439                                                                                                                                      | Tra2b*   | 1419543_A_AT                             |
| ubiquitin specific peptidase 39                                                                                                                                                                   | Usp39*   | 1460209_AT<br>1437007_X_AT               |
| <b>GO:0016481~negative regulation of transcription</b>                                                                                                                                            |          |                                          |
| Bmi1 polycomb ring finger oncogene                                                                                                                                                                | Bmi1*    | 1417493_AT                               |
| YY1 associated factor 2                                                                                                                                                                           | Yaf2     | 1423399_A_AT                             |
| ataxin 1                                                                                                                                                                                          | Atxn1*   | 1445695_AT<br>1438294_AT                 |
| bromodomain PHD finger transcription factor                                                                                                                                                       | Bptf*    | 1427311_AT<br>1427310_AT                 |
| frizzled homolog 1 (Drosophila)                                                                                                                                                                   | Fzd1     | 1437284_AT                               |
| glutamate-cysteine ligase, catalytic subunit                                                                                                                                                      | Gclc*    | 1424296_AT<br>1455959_S_AT               |
| inhibitor of DNA binding 2                                                                                                                                                                        | Id2*     | 1453596_AT                               |
| metadherin                                                                                                                                                                                        | Mtdh*    | 1455129_AT                               |
| nuclear receptor-binding SET-domain protein 1                                                                                                                                                     | Nsd1*    | 1435088_AT                               |
| polycomb group ring finger 6                                                                                                                                                                      | Pcgf6*   | 1424081_AT                               |
| predicted gene 13416; WW domain containing E3 ubiquitin protein ligase 1                                                                                                                          | Wwp1*    | 1427097_AT                               |
| purine rich element binding protein B                                                                                                                                                             | Purb     | 1428254_AT<br>1419642_AT                 |
| ring finger protein 2                                                                                                                                                                             | Rnf2*    | 1451519_AT                               |
| serine/threonine kinase receptor associated protein                                                                                                                                               | Strap*   | 1416566_AT                               |
| similar to Transcriptional repressor p66 alpha (GATA zinc finger domain-containing protein 2A); GATA zinc finger domain containing 2A                                                             | Gatad2a  | 1451197_S_AT<br>1423992_AT               |
| similar to hCG45299; purine rich element binding protein A                                                                                                                                        | Pura     | 1420628_AT<br>1456898_AT                 |
| ski sarcoma viral oncogene homolog (avian)                                                                                                                                                        | Ski*     | 1426373_AT<br>1429192_AT                 |
| suppressor of defective silencing 3 homolog (S. cerevisiae)                                                                                                                                       | Suds3    | 1427896_AT                               |
| suppressor of zeste 12 homolog (Drosophila)                                                                                                                                                       | Suz12*   | 1452364_AT                               |
| transducin (beta)-like 1 X-linked                                                                                                                                                                 | Tbl1x*   | 1434643_AT<br>1455042_AT<br>1434644_AT   |
| transducin-like enhancer of split 1, homolog of Drosophila E(spl)                                                                                                                                 | Tle1*    | 1422751_AT                               |
| tripartite motif-containing 27                                                                                                                                                                    | Trim27*  | 1448101_S_AT<br>1438376_S_AT             |
| zinc finger homeobox 3                                                                                                                                                                            | Zfhx3*   | 1449947_S_AT                             |
| <b>GO:0006829~zinc ion transport</b>                                                                                                                                                              |          |                                          |
| solute carrier family 30 (zinc transporter), member 4                                                                                                                                             | Slc30a4  | 1418843_AT                               |
| solute carrier family 30, member 10                                                                                                                                                               | Slc30a10 | 1438751_AT                               |
| solute carrier family 39 (metal ion transporter), member 8                                                                                                                                        | Slc39a8  | 1416832_AT                               |

|                                                                                                                                                                                                 |                  |                                        |
|-------------------------------------------------------------------------------------------------------------------------------------------------------------------------------------------------|------------------|----------------------------------------|
| solute carrier family 39 (zinc transporter), member 1; similar to Zinc transporter ZIP1 (Zinc-iron regulated transporter-like) (Solute carrier family 39 member 1)                              | Slc39a1          | 1424424_AT                             |
| solute carrier family 39 (zinc transporter), member 7                                                                                                                                           | Slc39a7          | 1416949_S_AT                           |
| <b>GO:0043161~proteasomal ubiquitin-dependent protein catabolic process</b>                                                                                                                     |                  |                                        |
| CD2-associated protein                                                                                                                                                                          | Cd2ap            | 1420908_AT<br>1420906_AT               |
| Der1-like domain family, member 2                                                                                                                                                               | Derl2            | 1448438_AT                             |
| ER degradation enhancer, mannosidase alpha-like 3                                                                                                                                               | Edem3            | 1460401_AT                             |
| F-box protein 6                                                                                                                                                                                 | Fbxo6            | 1417501_AT                             |
| PEST proteolytic signal containing nuclear protein                                                                                                                                              | Pcnp*            | 1452735_AT                             |
| transducin (beta)-like 1 X-linked                                                                                                                                                               | Tbl1x*           | 1455042_AT<br>1434643_AT<br>1434644_AT |
| ubiquitin-conjugating enzyme E2G 2                                                                                                                                                              | Ube2g2*          | 1417032_AT                             |
| <b>GO:0016570~histone modification</b>                                                                                                                                                          |                  |                                        |
| Bmi1 polycomb ring finger oncogene                                                                                                                                                              | Bmi1*            | 1417493_AT                             |
| CREB binding protein                                                                                                                                                                            | Crebbp*          | 1436983_AT                             |
| HECT, UBA and WWE domain containing 1                                                                                                                                                           | Huwe1*           | 1415703_AT                             |
| histone deacetylase 2                                                                                                                                                                           | Hdac2*           | 1445684_S_AT                           |
| myeloid/lymphoid or mixed-lineage leukemia 5                                                                                                                                                    | Mll5*            | 1439108_AT                             |
| nuclear receptor-binding SET-domain protein 1                                                                                                                                                   | Nsd1*            | 1435088_AT                             |
| ring finger protein 2                                                                                                                                                                           | Rnf2*            | 1451519_AT                             |
| suppressor of zeste 12 homolog (Drosophila)                                                                                                                                                     | Suz12*           | 1452364_AT                             |
| transformation/transcription domain-associated protein                                                                                                                                          | Trrap*           | 1416532_AT                             |
| <b>GO:0006357~regulation of transcription from RNA polymerase II promoter</b>                                                                                                                   |                  |                                        |
| Bmi1 polycomb ring finger oncogene                                                                                                                                                              | Bmi1*            | 1417493_AT                             |
| CREB binding protein                                                                                                                                                                            | Crebbp*          | 1436983_AT                             |
| E74-like factor 1                                                                                                                                                                               | Elf1             | 1417540_AT                             |
| E74-like factor 2                                                                                                                                                                               | Elf2             | 1428045_A_AT                           |
| ELL associated factor 1                                                                                                                                                                         | Eaf1             | 1433555_AT                             |
| MAD homolog 1 (Drosophila)                                                                                                                                                                      | Smad1            | 1459843_S_AT                           |
| PRP6 pre-mRNA splicing factor 6 homolog (yeast)                                                                                                                                                 | Prpf6*           | 1424036_AT<br>1454789_X_AT             |
| activating transcription factor 5                                                                                                                                                               | Atf5             | 1425927_A_AT                           |
| agrin                                                                                                                                                                                           | Agrrn*           | 1426670_AT                             |
| aryl hydrocarbon receptor nuclear translocator-like                                                                                                                                             | Arntl            | 1425099_A_AT                           |
| ataxin 1                                                                                                                                                                                        | Atxn1*           | 1445695_AT<br>1438294_AT               |
| bromodomain PHD finger transcription factor                                                                                                                                                     | Bptf*            | 1427311_AT<br>1427310_AT               |
| cAMP responsive element binding protein 1                                                                                                                                                       | Creb1*           | 1452901_AT                             |
| circadian locomotor output cycles kaput                                                                                                                                                         | Clock            | 1418660_AT<br>1418659_AT               |
| core binding factor beta                                                                                                                                                                        | Cbfb             | 1460716_A_AT                           |
| inhibitor of DNA binding 2                                                                                                                                                                      | Id2*             | 1453596_AT                             |
| melanoma antigen, family D, 1                                                                                                                                                                   | Maged1           | 1450062_A_AT                           |
| metadherin                                                                                                                                                                                      | Mtdh*            | 1455129_AT                             |
| nuclear factor of activated T-cells 5                                                                                                                                                           | Nfat5            | 1438999_A_AT                           |
| nuclear receptor subfamily 5, group A, member 2                                                                                                                                                 | Nr5a2(L<br>RH-1) | 1420410_AT                             |
| nuclear receptor-binding SET-domain protein 1                                                                                                                                                   | Nsd1*            | 1435088_AT                             |
| one cut domain, family member 1                                                                                                                                                                 | Onecut1          | 1456974_AT                             |
| polycomb group ring finger 6                                                                                                                                                                    | Pcgf6*           | 1424081_AT                             |
| predicted gene 12372; predicted gene 14335; similar to RNA polymerase II TATA box binding protein-associated factor G; TAF9 RNA polymerase II, TATA box binding protein (TBP)-associated factor | Taf9             | 1451509_AT                             |
| ring finger protein 2                                                                                                                                                                           | Rnf2*            | 1451519_AT                             |
| serine/threonine kinase receptor associated protein                                                                                                                                             | Strap*           | 1416566_AT                             |
| similar to MAD homolog 4 (Drosophila); MAD homolog 4 (Drosophila)                                                                                                                               | Smad4            | 1422485_AT                             |
| similar to Nuclear receptor coactivator 1 (NCoA-1) (Steroid                                                                                                                                     | Ncoa1            | 1418594_A_AT                           |

|                                                                                                                   |         |                                        |
|-------------------------------------------------------------------------------------------------------------------|---------|----------------------------------------|
| receptor coactivator 1) (SRC-1) (Nuclear receptor coactivator protein 1) (mNRC-1); nuclear receptor coactivator 1 |         |                                        |
| ski sarcoma viral oncogene homolog (avian)                                                                        | Ski*    | 1426373_AT<br>1429192_AT               |
| suppressor of zeste 12 homolog (Drosophila)                                                                       | Suz12*  | 1452364_AT                             |
| thyroid hormone receptor associated protein 3; predicted gene 5898                                                | Thrap3  | 1427408_A_AT                           |
| transducin (beta)-like 1 X-linked                                                                                 | Tbl1x*  | 1455042_AT<br>1434643_AT<br>1434644_AT |
| transducin-like enhancer of split 1, homolog of Drosophila E(spl)                                                 | Tle1*   | 1422751_AT                             |
| tripartite motif-containing 27                                                                                    | Trim27* | 1438376_S_AT<br>1448101_S_AT           |
| zinc finger homeobox 3                                                                                            | Zfhx3*  | 1449947_S_AT                           |
| zinc finger protein 148                                                                                           | Zfp148  | 1449069_AT<br>1427730_A_AT             |

\* : Genes appearing more than two times in the functional groupings.
